# Supplementary material for: A feasibility study of “range-extended” EXAFS measurement at the Pt L3-edge of Pt/Al2O3 in the presence of Au2O3
Source: Royal Society of Chemistry journal article supplement (doi:10.1039/c7ja00309a), 2017-10-27
Supplement: c7ja00309a1.pdf [file c7ja00309a1.pdf]

## Supporting Information for A feasibility study of “range-extended” EXAFS measurement at Pt L<sub>3</sub>-edge of Pt/Al<sub>2</sub>O<sub>3</sub> in the presence of Au<sub>2</sub>O<sub>3</sub>

Hiroyuki Asakura,<sup>ab</sup> Naomi Kawamura,<sup>c</sup> Masaichiro Mizumaki,<sup>c</sup> Kiyofumi Nitta,<sup>c</sup> Kenji Ishii,<sup>d</sup> Saburo Hosokawa,<sup>ab</sup> Kentaro Teramura,<sup>ab</sup> and Tsunehiro Tanaka<sup>ab</sup>

<sup>a</sup> Department of Molecular Engineering, Graduate School of Engineering, Kyoto University, Kyotodaigaku Katsura, Nishikyo-ku, Kyoto 615-8510, Japan

<sup>b</sup> Elements Strategy Initiative for Catalysts & Batteries (ESICB), Kyoto University, 1-30 Goryo-Ohara, Nishikyo-ku, Kyoto 615-8245, Japan

<sup>c</sup> Japan Synchrotron Radiation Research Institute, SPring-8, 1-1-1 Kouto, Sayo, Hyogo 679-5198, Japan

<sup>d</sup> Synchrotron Radiation Research Center, National Institutes for Quantum and Radiological Science and Technology, 1-1-1 Kouto, Sayo, Hyogo 679-5148, Japan

### Pt L<sub>3</sub>-edge XAS spectra of 0.5 wt% Pt/Al<sub>2</sub>O<sub>3</sub> in the transmission and TFY modes

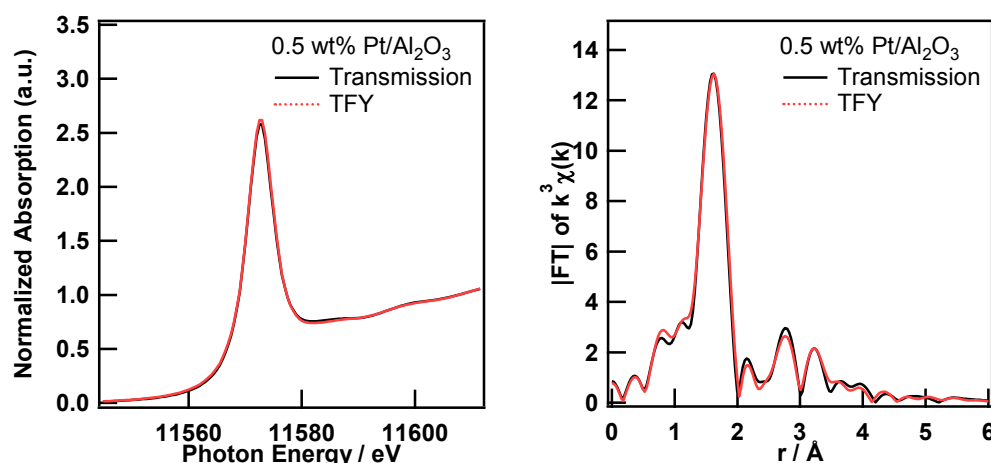

Fig. S1 Pt L<sub>3</sub>-edge XANES (left) and Fourier transform of EXAFS (right) spectra of 0.5 wt% Pt/Al<sub>2</sub>O<sub>3</sub> measured in the transmission and TFY modes.

In general, XAS spectra measured in the fluorescence mode are believed to be valid when they are measured in the “thick and dilute” condition or “thin (and concentrated)” condition<sup>1</sup>. However, for the samples in the real world environment, to satisfy a suitable condition in the fluorescence mode is not so obvious. Therefore, we first evaluate the validity of the XAS spectrum measured in the TFY mode simply by comparing it with the XAS spectrum of the same sample measured in the transmission mode. The Pt L<sub>3</sub>-edge X-ray absorption near-edge structure (XANES) spectra of 0.5 wt% Pt/Al<sub>2</sub>O<sub>3</sub> measured in the transmission mode and TFY mode with a Pilatus detector is shown in Figure S1 (left). The XANES spectrum measured in the TFY mode was almost identical to that in the transmission mode. This is also verified in the EXAFS region (Figure S1 (right)). These results indicate that the present Pt/Al<sub>2</sub>O<sub>3</sub> samples, whose Pt content is lower than 0.5 wt%, are suitable for the XAS measurement in the fluorescence mode.

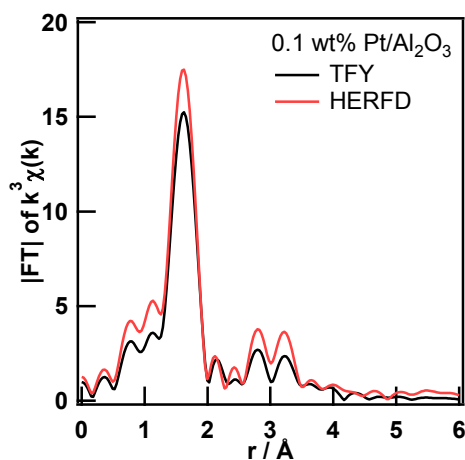

Fig. S2 Fourier transform of Pt L<sub>3</sub>-edge EXAFS spectra of 0.1 wt% Pt/Al<sub>2</sub>O<sub>3</sub> measured in the TFY and HERFD modes.

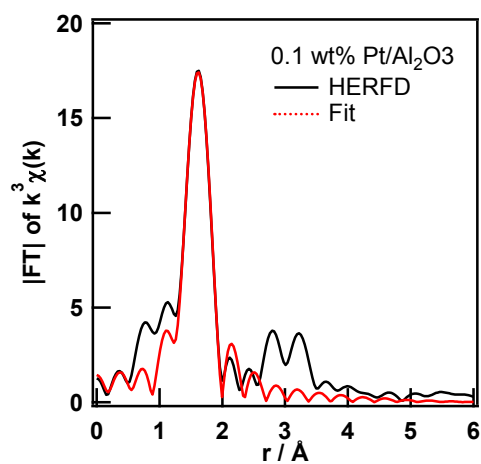

Fig. S3 Fourier transform of Pt L<sub>3</sub>-edge EXAFS spectra of 0.1 wt% Pt/Al<sub>2</sub>O<sub>3</sub> measured in the HERFD mode and its curve fitting result.

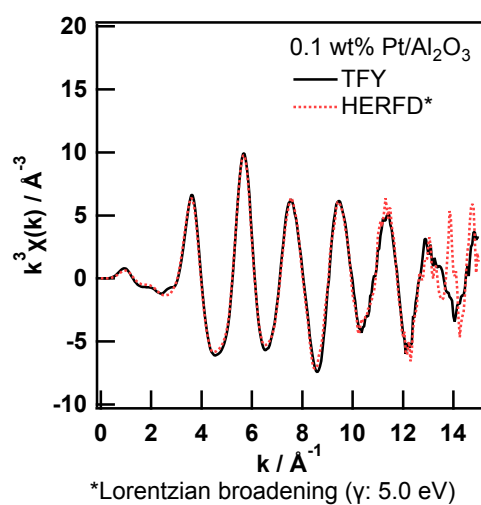

Fig. S4 Fourier transform of Pt L<sub>3</sub>-edge EXAFS spectra of 0.1 wt% Pt/Al<sub>2</sub>O<sub>3</sub> measured in the TFY mode and HERFD mode with Lorentzian broadening with  $\gamma = 5.0$  eV.

## References

1. J. Jaklevic, J. A. Kirby, M. P. Klein, A. S. Robertson, G. S. Brown and P. Eisenberger, *Solid State Commun.*, 1977, **23**, 679-682.
